# Supplementary material
Source: ML conference proceedings conference paper supplement (https://openreview.net/forum?id=li0Wg2LryZ)
Supplement: supplementary_material [file DUET_unified_seq_len_96.pdf › CGTFra-main/DUET-main/figures/DUET_unified_seq_len_96.pdf]

Table 1: Unified hyperparameter results for the long-term forecasting task. **We fix the input length as 96 for all experiments.** Avg is averaged from all four prediction lengths, that is 96, 192, 336, 720. The scripts for reproducing the results can be found at: [https://github.com/decisionintelligence/DUET/tree/main/scripts/multivariate\\_forecast/DUET\\_unified\\_seq\\_len\\_96.sh](https://github.com/decisionintelligence/DUET/tree/main/scripts/multivariate_forecast/DUET_unified_seq_len_96.sh).

| Models      | Metrics | DUET  |       |
|-------------|---------|-------|-------|
|             |         | mse   | mae   |
| ETTh1       | 96      | 0.377 | 0.393 |
|             | 192     | 0.429 | 0.425 |
|             | 336     | 0.471 | 0.446 |
|             | 720     | 0.496 | 0.480 |
|             | Avg     | 0.443 | 0.436 |
| ETTh2       | 96      | 0.296 | 0.345 |
|             | 192     | 0.368 | 0.389 |
|             | 336     | 0.411 | 0.422 |
|             | 720     | 0.412 | 0.434 |
|             | Avg     | 0.372 | 0.397 |
| ETTh1       | 96      | 0.324 | 0.354 |
|             | 192     | 0.369 | 0.379 |
|             | 336     | 0.404 | 0.402 |
|             | 720     | 0.463 | 0.437 |
|             | Avg     | 0.390 | 0.393 |
| ETTh2       | 96      | 0.174 | 0.255 |
|             | 192     | 0.243 | 0.302 |
|             | 336     | 0.304 | 0.341 |
|             | 720     | 0.399 | 0.397 |
|             | Avg     | 0.280 | 0.324 |
| Weather     | 96      | 0.163 | 0.202 |
|             | 192     | 0.218 | 0.252 |
|             | 336     | 0.274 | 0.294 |
|             | 720     | 0.349 | 0.343 |
|             | Avg     | 0.251 | 0.273 |
| Electricity | 96      | 0.145 | 0.233 |
|             | 192     | 0.163 | 0.248 |
|             | 336     | 0.175 | 0.262 |
|             | 720     | 0.204 | 0.291 |
|             | Avg     | 0.172 | 0.258 |
| Solar       | 96      | 0.200 | 0.207 |
|             | 192     | 0.228 | 0.233 |
|             | 336     | 0.262 | 0.244 |
|             | 720     | 0.258 | 0.249 |
|             | Avg     | 0.237 | 0.233 |
| Traffic     | 96      | 0.407 | 0.252 |
|             | 192     | 0.431 | 0.262 |
|             | 336     | 0.456 | 0.269 |
|             | 720     | 0.509 | 0.292 |
|             | Avg     | 0.451 | 0.269 |
| Exchange    | 96      | 0.086 | 0.205 |
|             | 192     | 0.182 | 0.305 |
|             | 336     | 0.310 | 0.403 |
|             | 720     | 0.693 | 0.624 |
|             | Avg     | 0.318 | 0.384 |
