# Supplementary material
Source: ML conference proceedings conference paper supplement (https://openreview.net/forum?id=li0Wg2LryZ)
Supplement: supplementary_material [file RelatedWorks_IVD.pdf › CGTFra-main/CGTFra/figures/RelatedWorks_IVD.pdf]

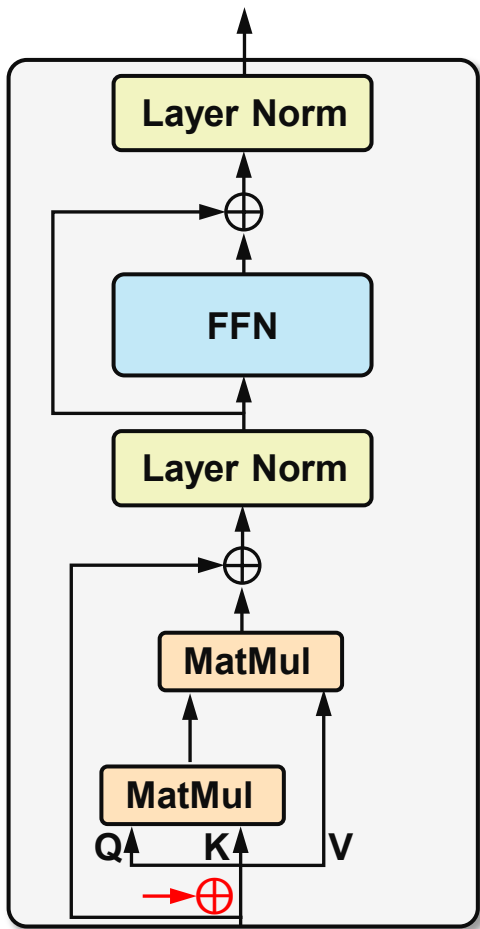

Sageformer

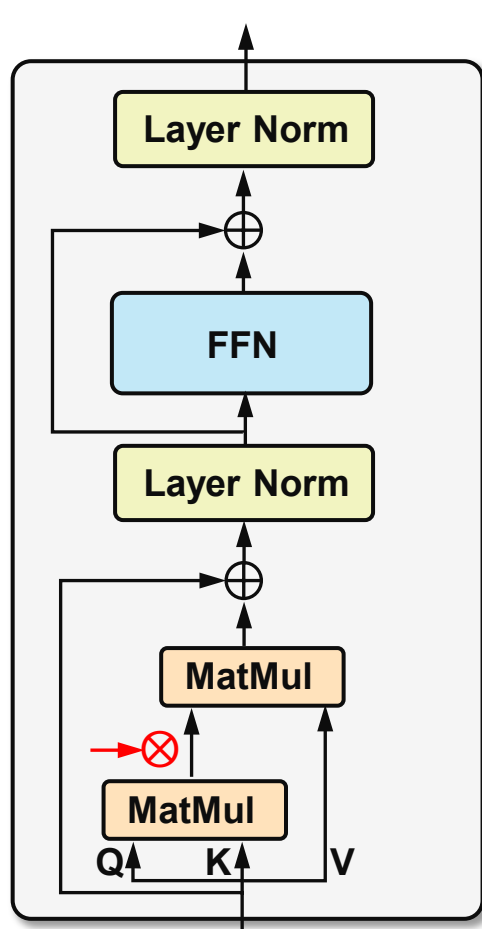

DUET

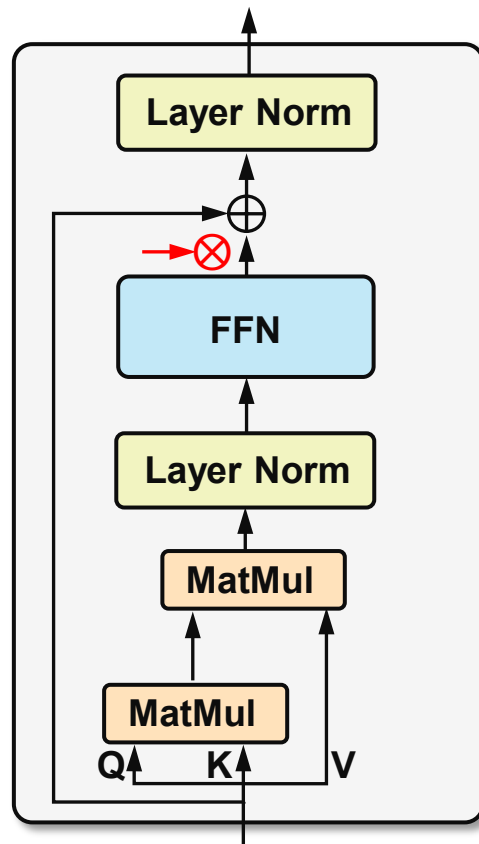

GL-STGTN

Injecting the inter-variable dependency via multiplicative and residual ways.

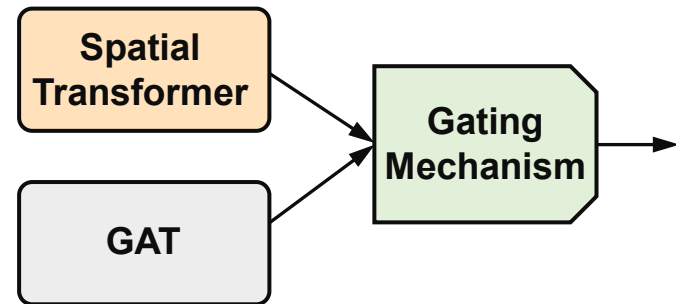

STGAGRTN
