# Supplementary material
Source: ML conference proceedings conference paper supplement (https://openreview.net/forum?id=li0Wg2LryZ)

deep

shallow

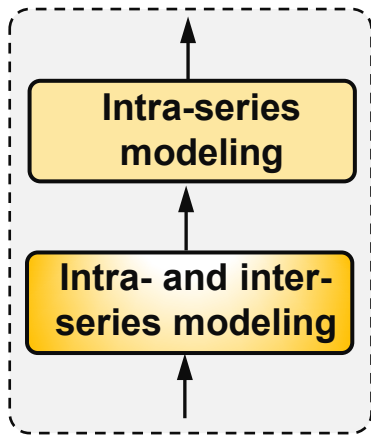

(a)

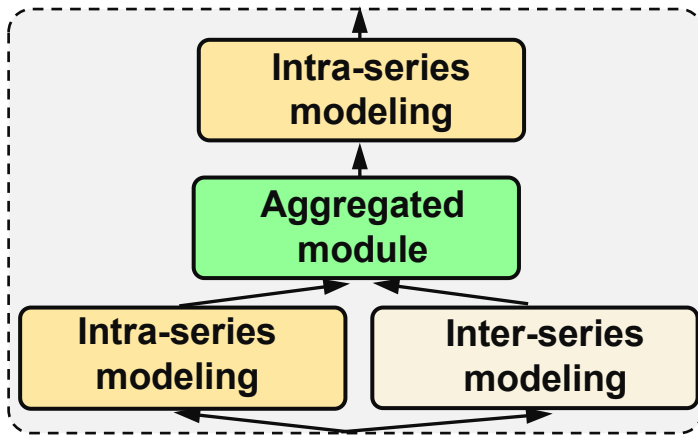

(b)

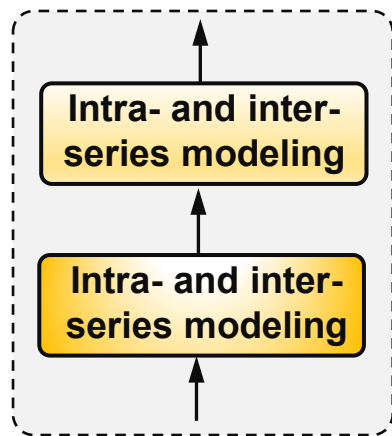

(c)

Supplement: supplementary_material [file LearningParadigm.pdf › CGTFra-main/CGTFra/figures/LearningParadigm.pdf]

Raw input curve

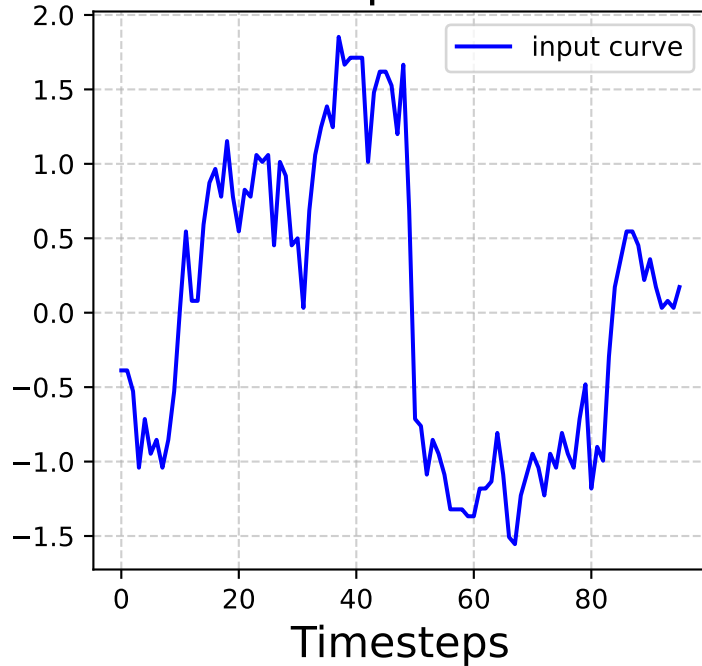

Input

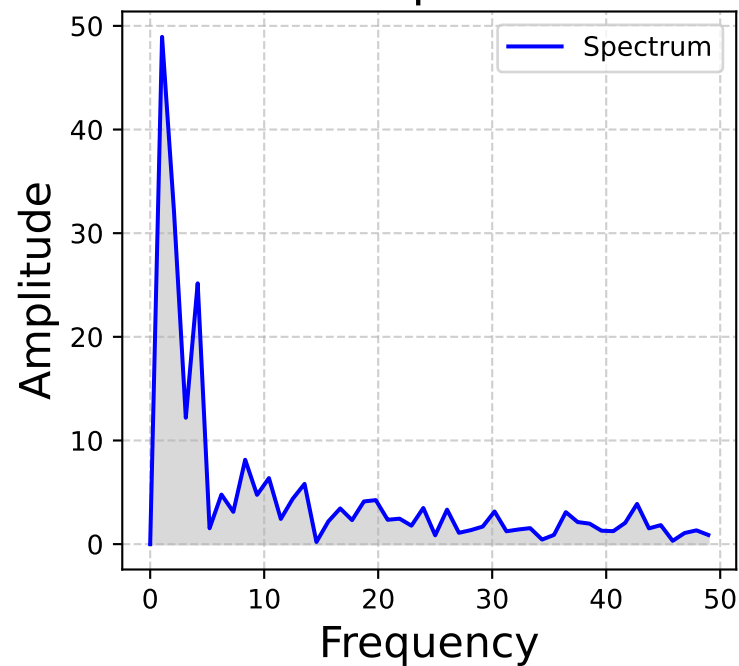

After Linear embedding

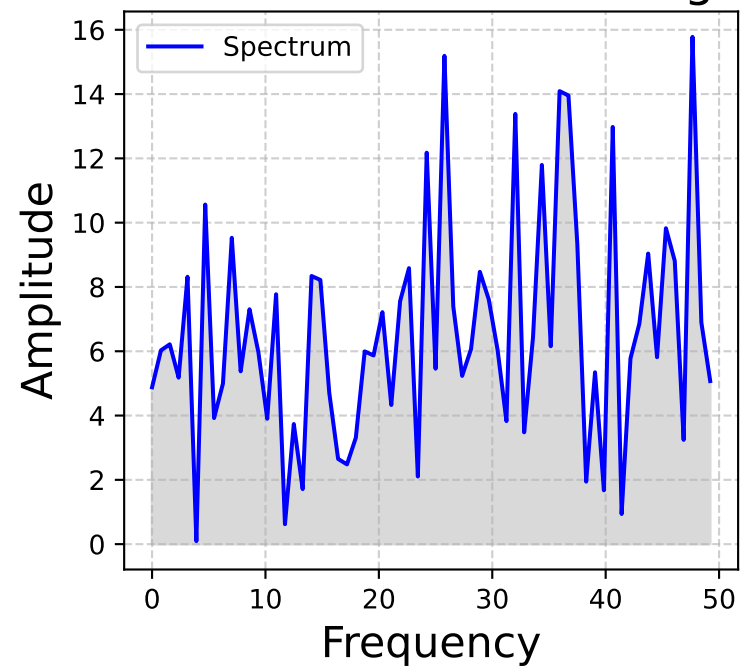

After FMR embedding

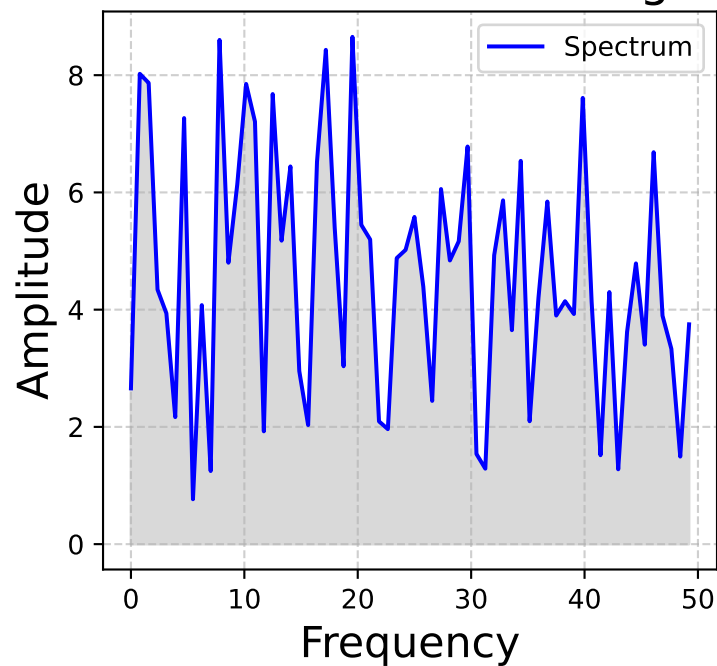

Supplement: supplementary_material [file Spectrum_ETTh1_96.pdf › CGTFra-main/CGTFra/figures/Spectrum_ETTh1_96.pdf]

# ECL (321 Variables)

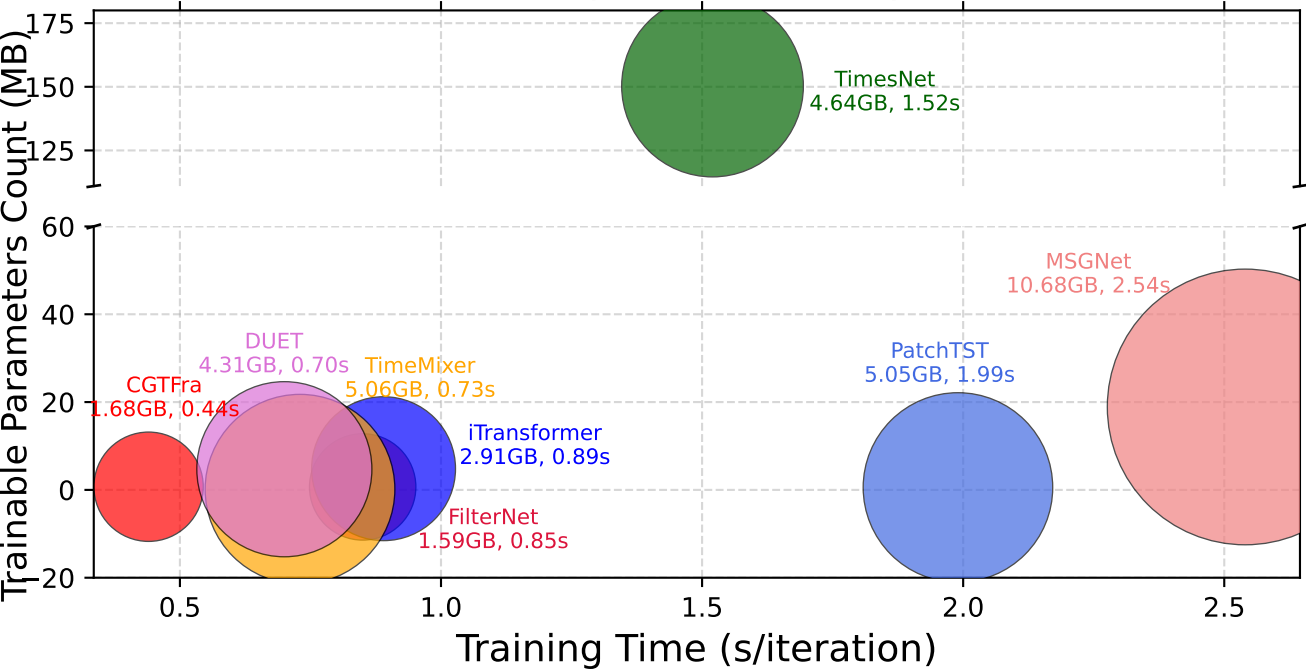

Supplement: supplementary_material [file computation_efficiency-ECL.pdf › CGTFra-main/CGTFra/figures/computation_efficiency-ECL.pdf]

# ETTh2 (7 Variables)

Trainable Parameters Count (MB)

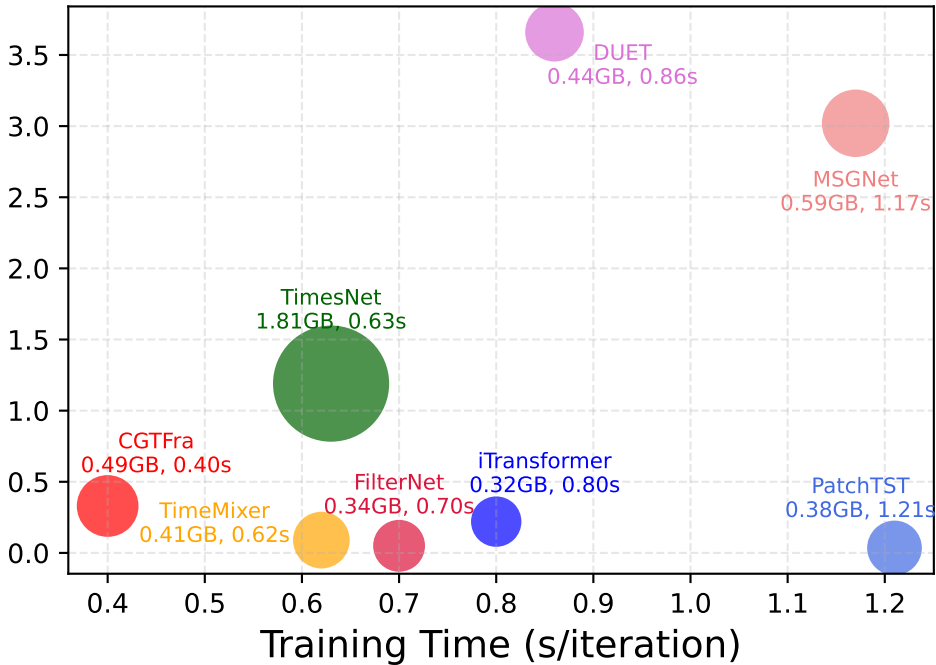

Training Time (s/iteration)

Supplement: supplementary_material [file computation_efficiency-ETTh2.pdf › CGTFra-main/CGTFra/figures/computation_efficiency-ETTh2.pdf]

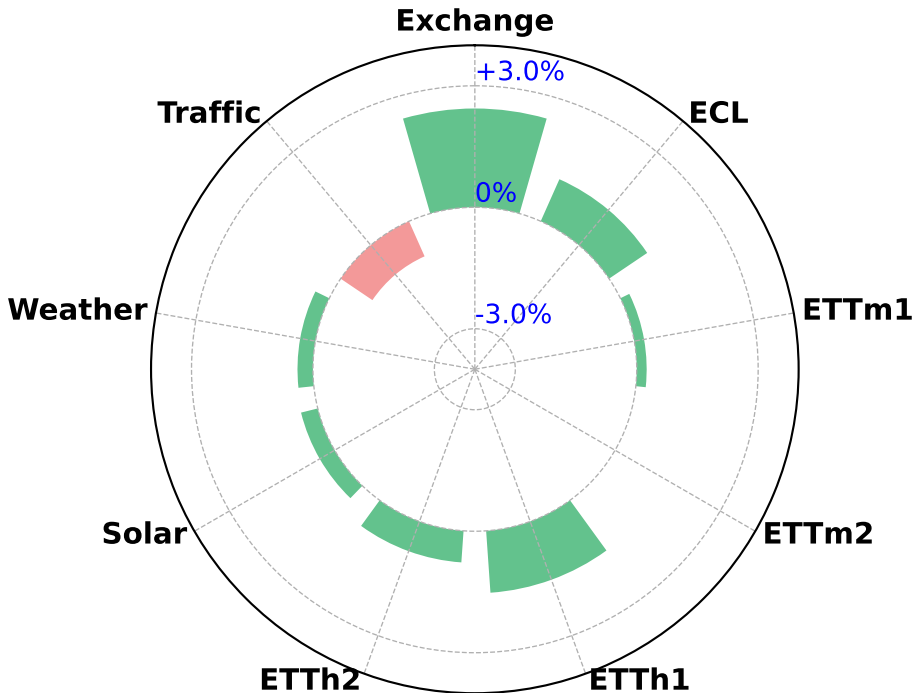

Supplement: supplementary_material [file iTransformer_PE.pdf › CGTFra-main/CGTFra/figures/iTransformer_PE.pdf]

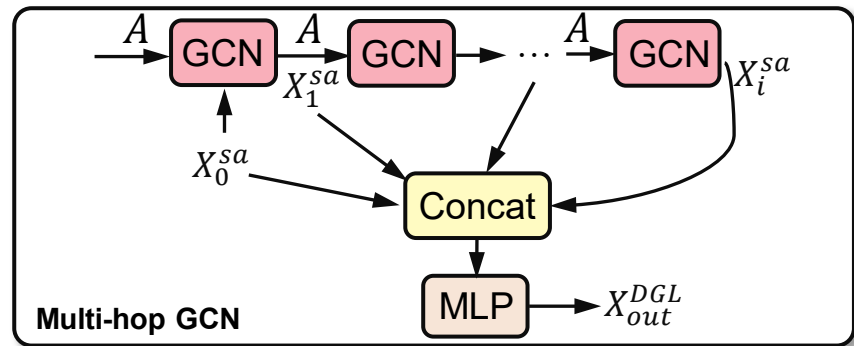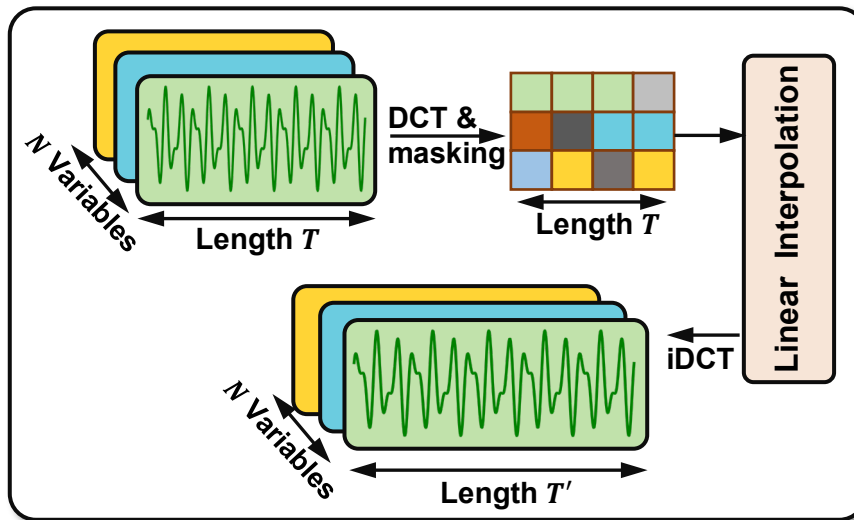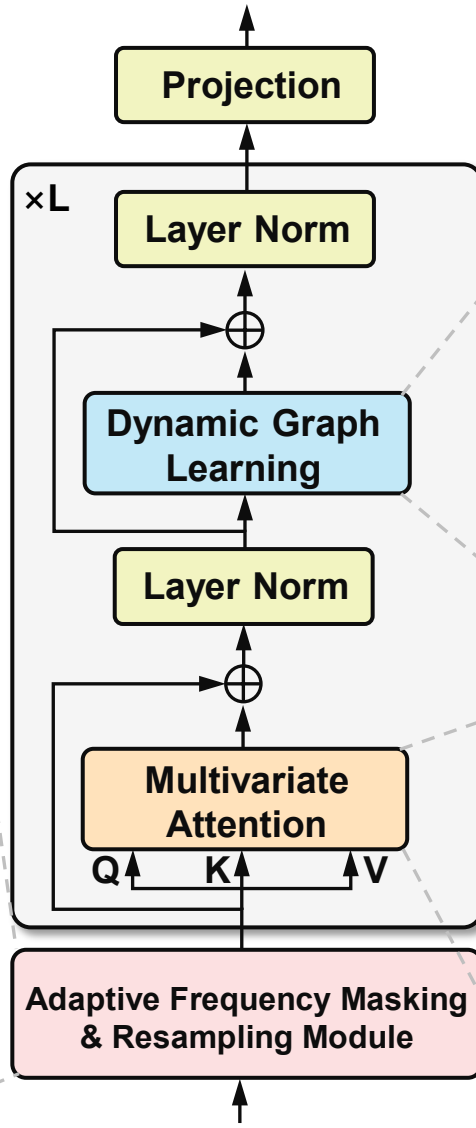

**Optimization Objective:**  $\mathcal{L} = \mathcal{L}_{MAE} + \lambda \mathcal{L}_{align}$

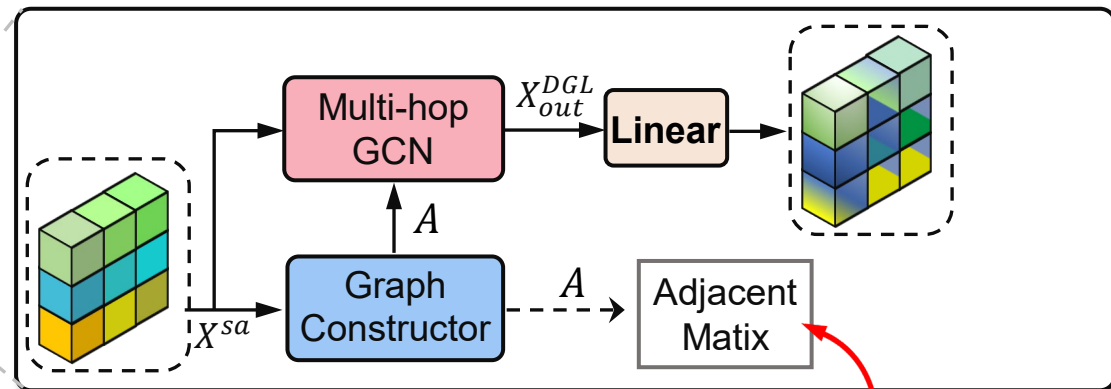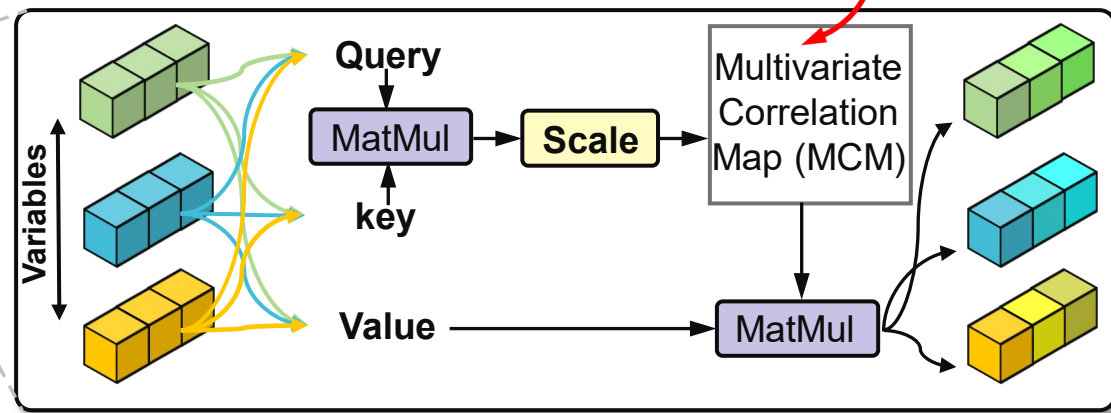

Supplement: supplementary_material [file methodology.pdf › CGTFra-main/CGTFra/figures/methodology.pdf]
